# Supplementary material for: Synthesis, docking and biological evaluation of purine-5-N-isosteresas anti-inflammatory agents
Source: Royal Society of Chemistry journal article supplement (doi:10.1039/d4ra02970d), 2024-01-01
Supplement: d4ra02970d1.pdf [file d4ra02970d1.pdf]

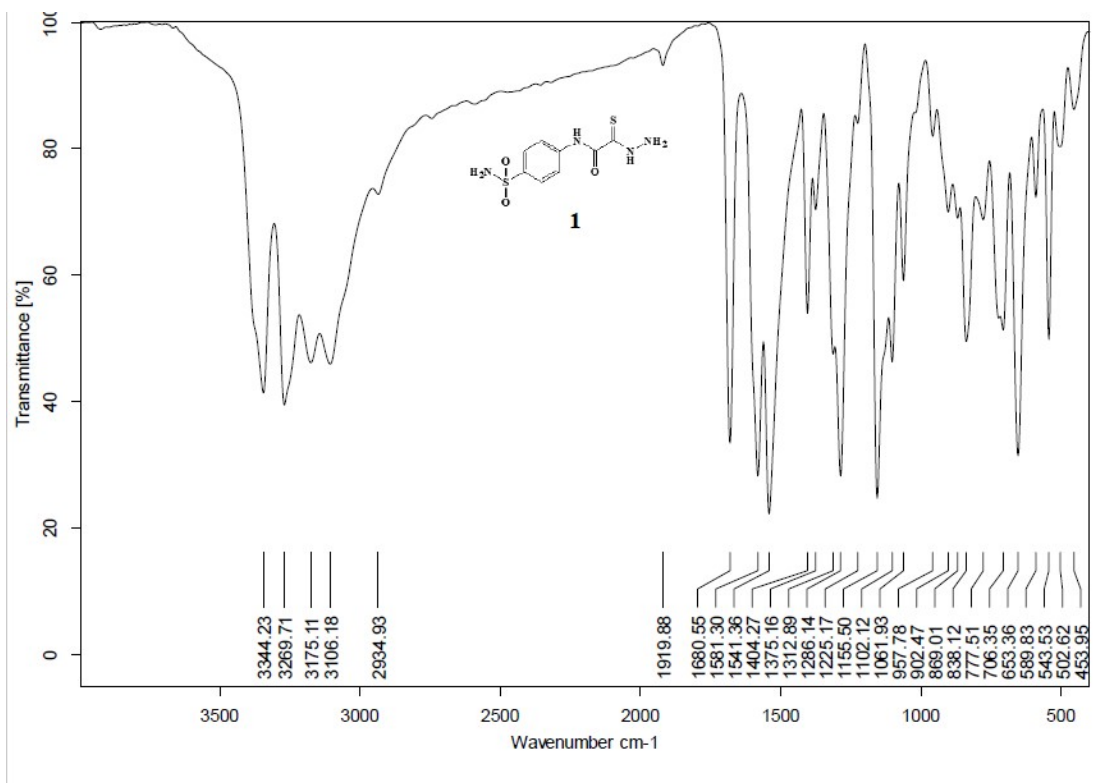

Figure 1: IR Spectrum of compound 1

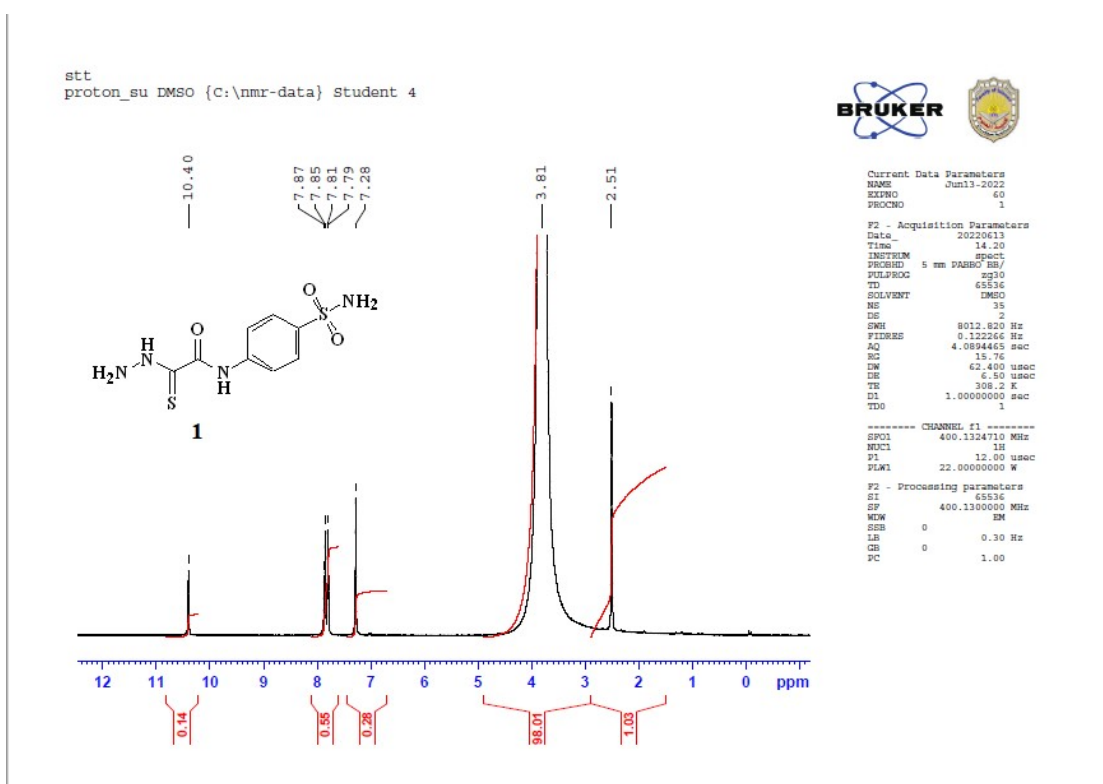

Figure 2: <sup>1</sup>H NMR Spectrum of compound 2

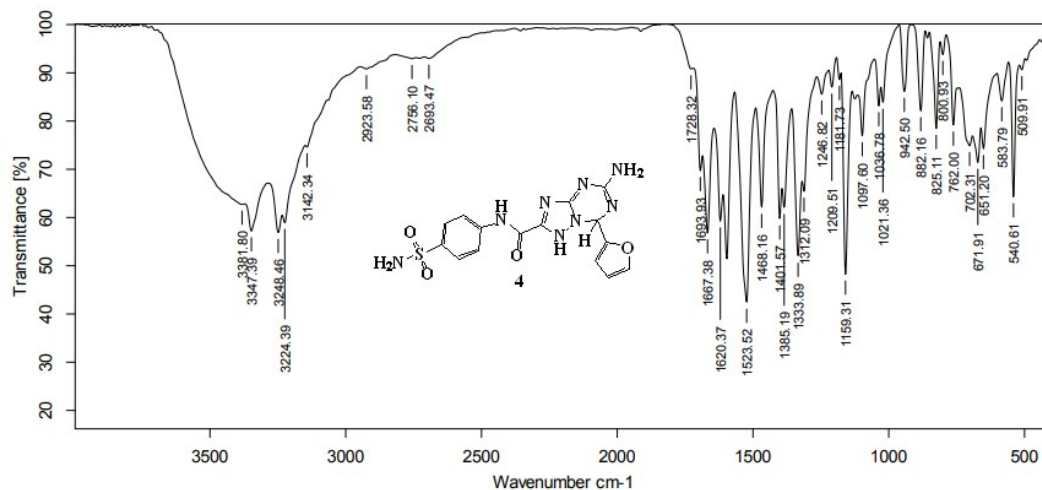

1-CH\_TRANS.0

12:34:39 a

17/07/2023

Figure 3: IR Spectrum of compound 4

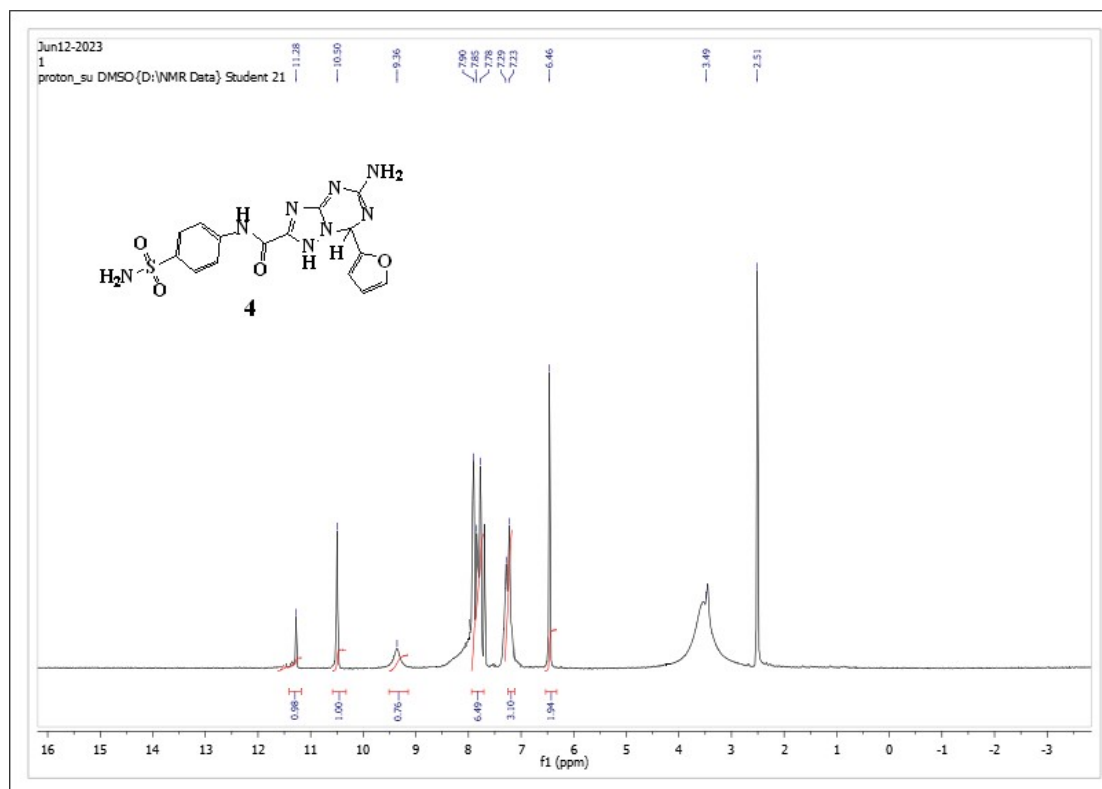

Figure 4: <sup>1</sup>H NMR Spectrum of compound 4

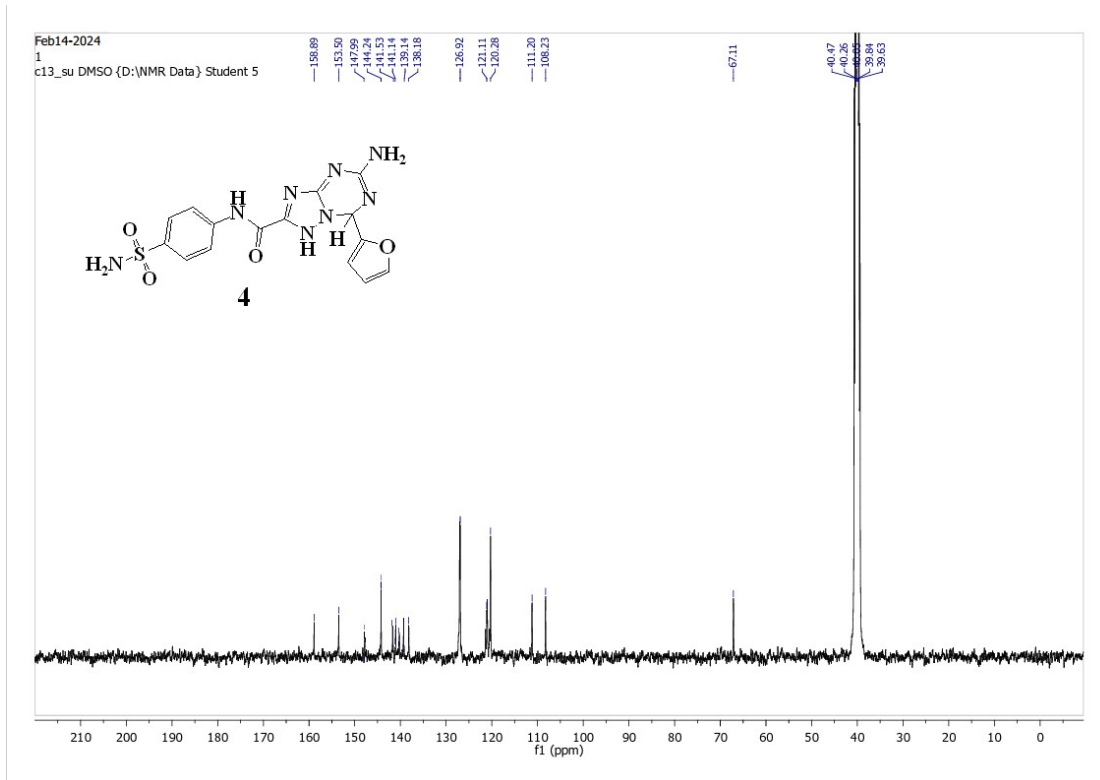

Figure 5:  $^{13}\text{C}$ NMR Spectrum of compound 4

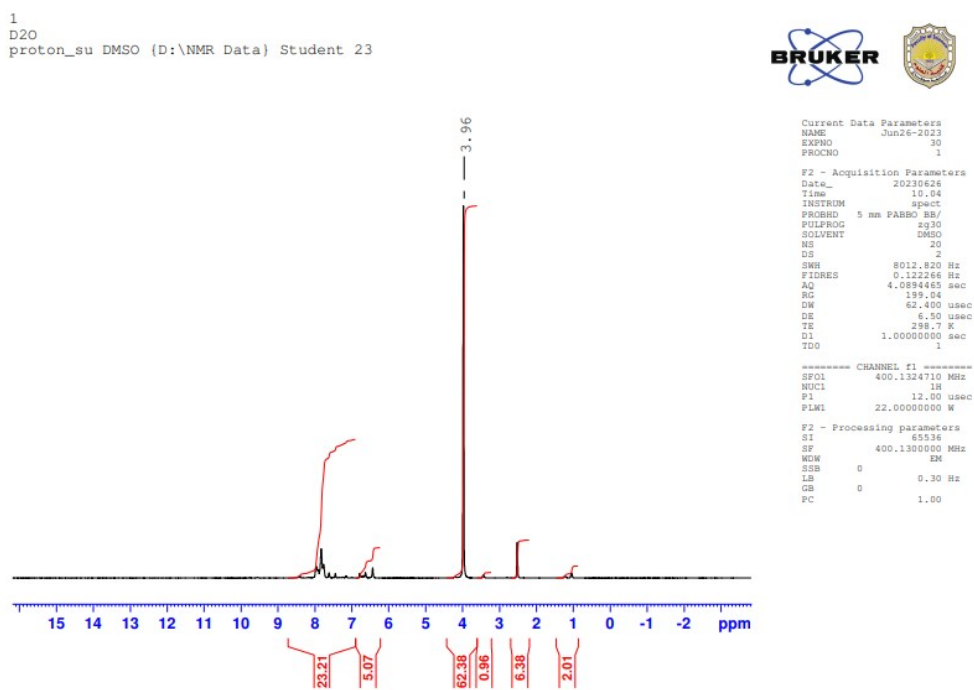

Figure 6:  $\text{D}_2\text{O}$  Spectrum of compound 4

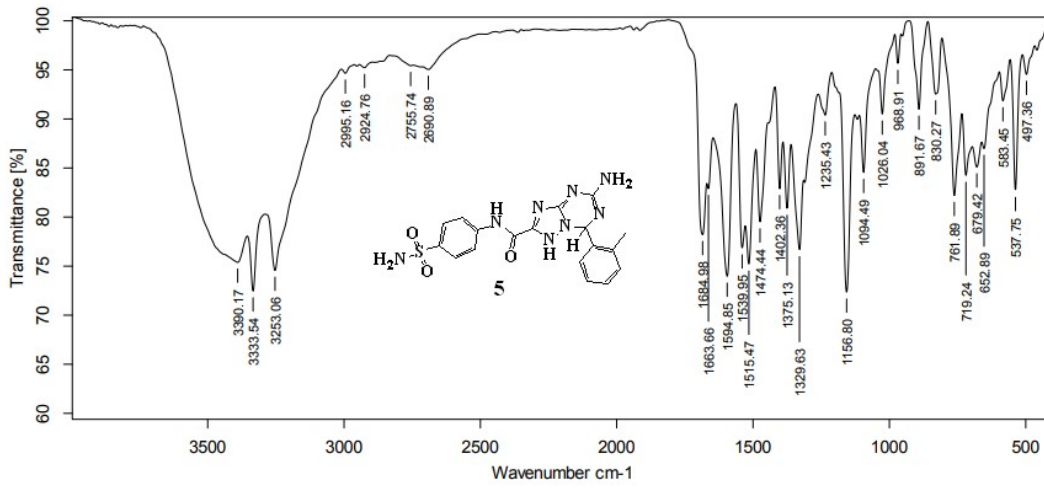

2-CH\_TRANS.0

12:35:22 ā

17/07/2023

Figure 7: IR Spectrum of compound 5

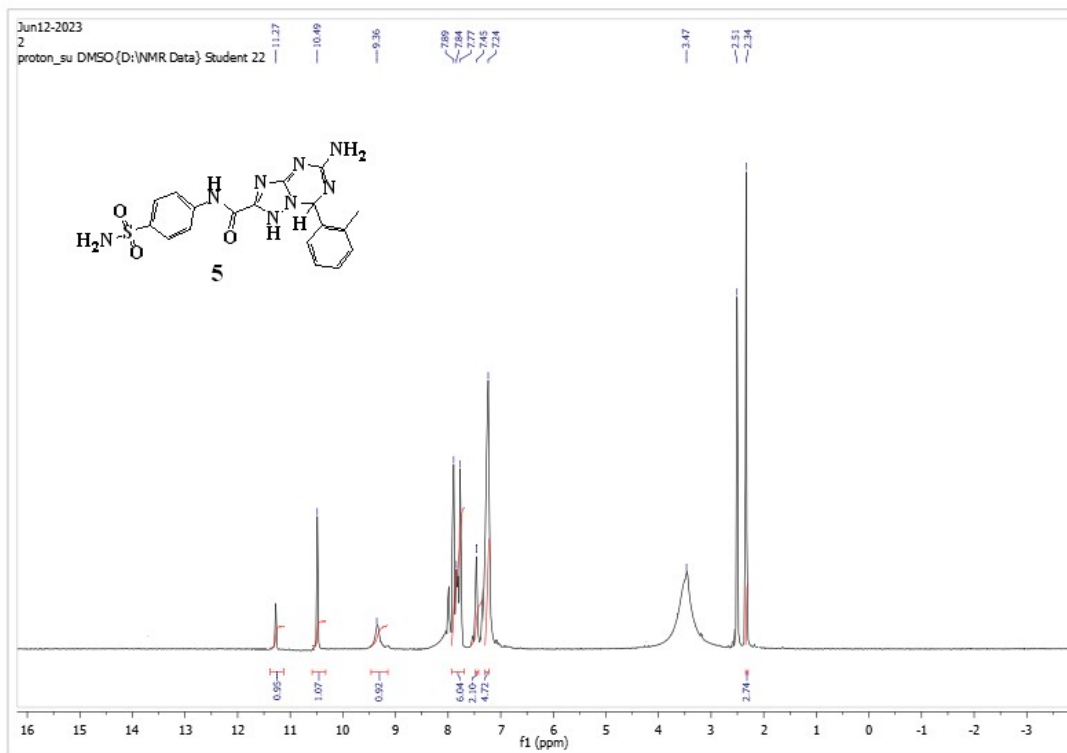

Figure 8: <sup>1</sup>H NMR Spectrum of compound 5

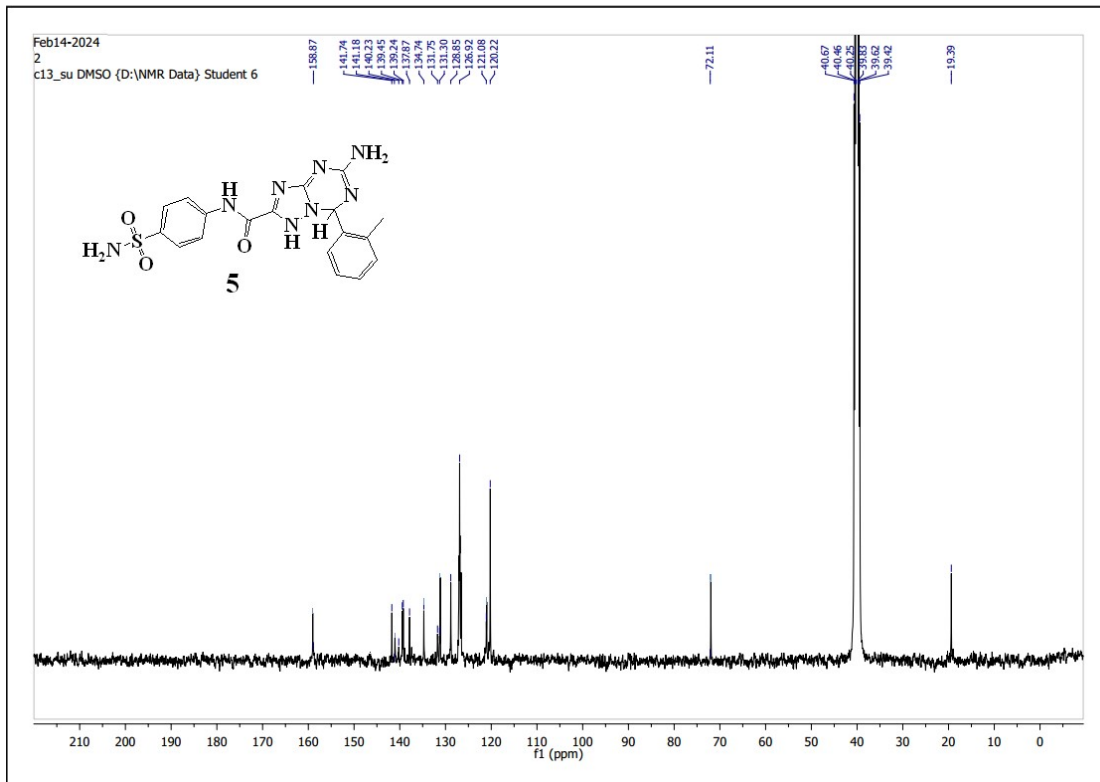

Figure 9:  $^{13}\text{C}$ NMR Spectrum of compound 5

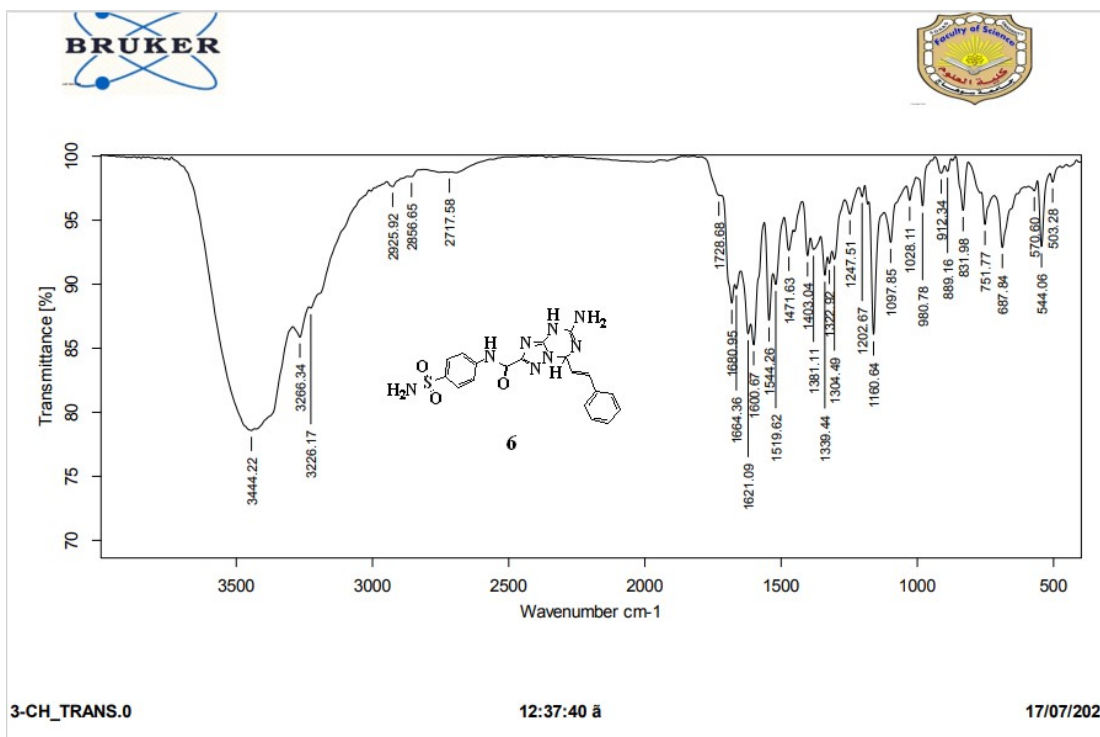

Figure 10: IR Spectrum of compound 6

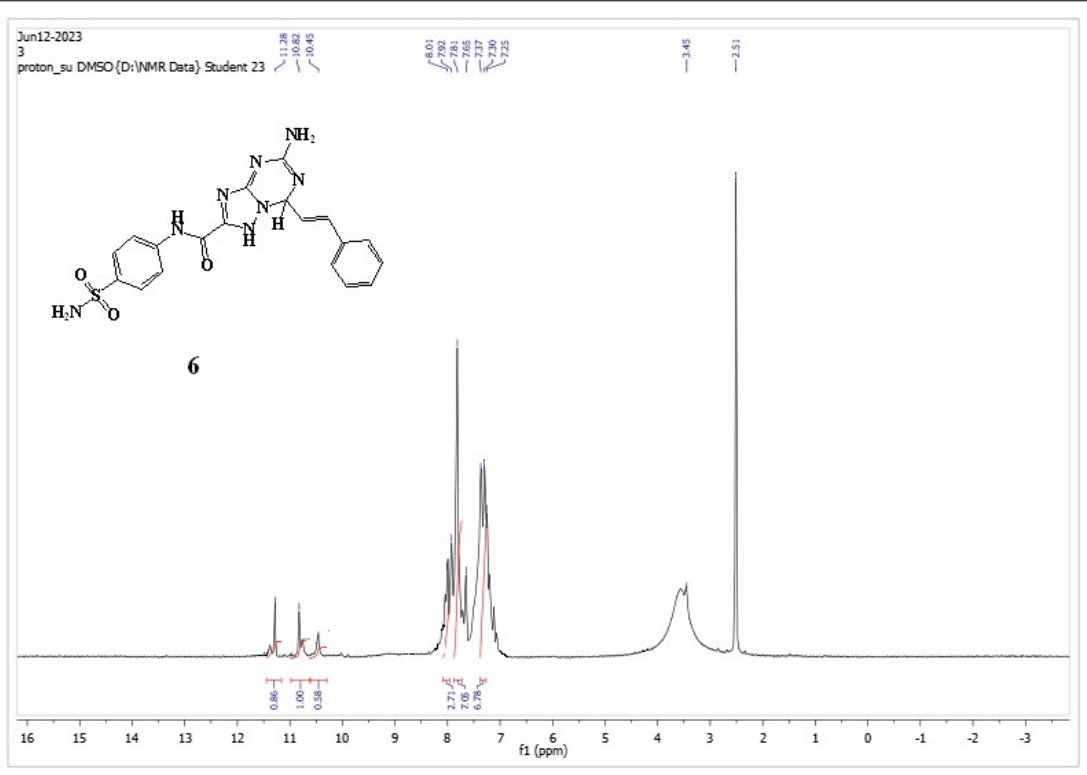

Figure 11:  $^1\text{H}$ NMR Spectrum of compound 6

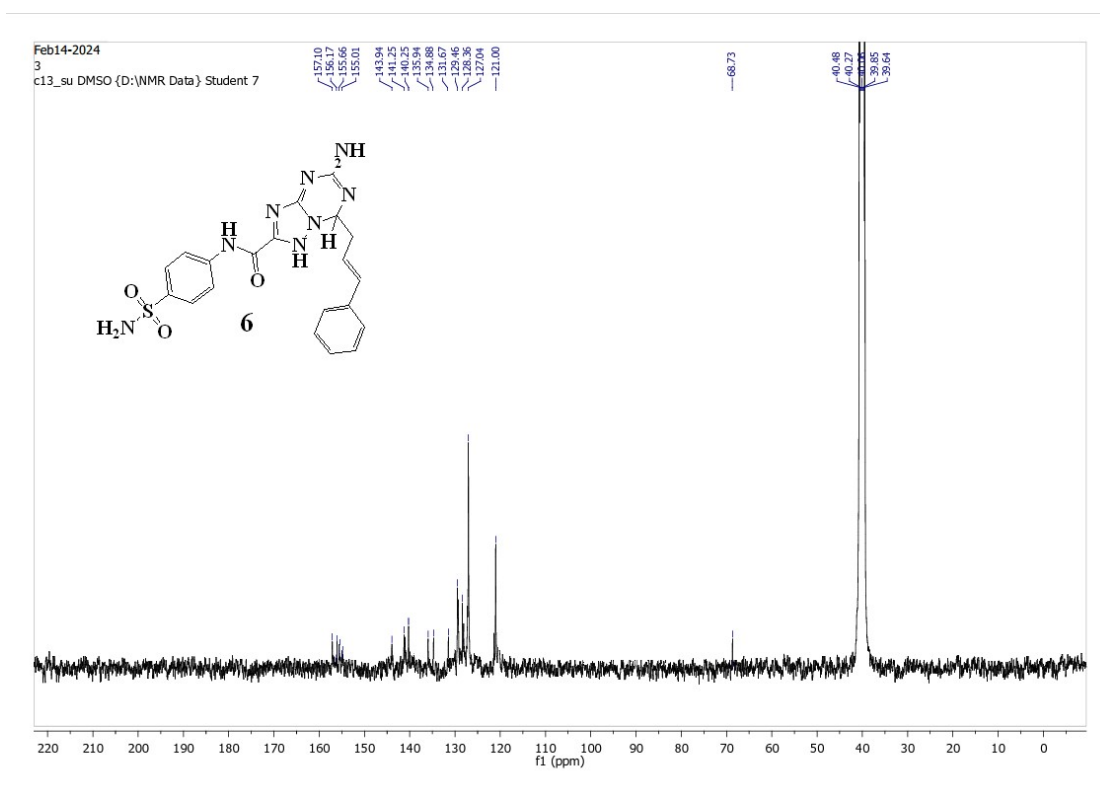

Figure 12:  $^{13}\text{C}$ NMR Spectrum of compound 6

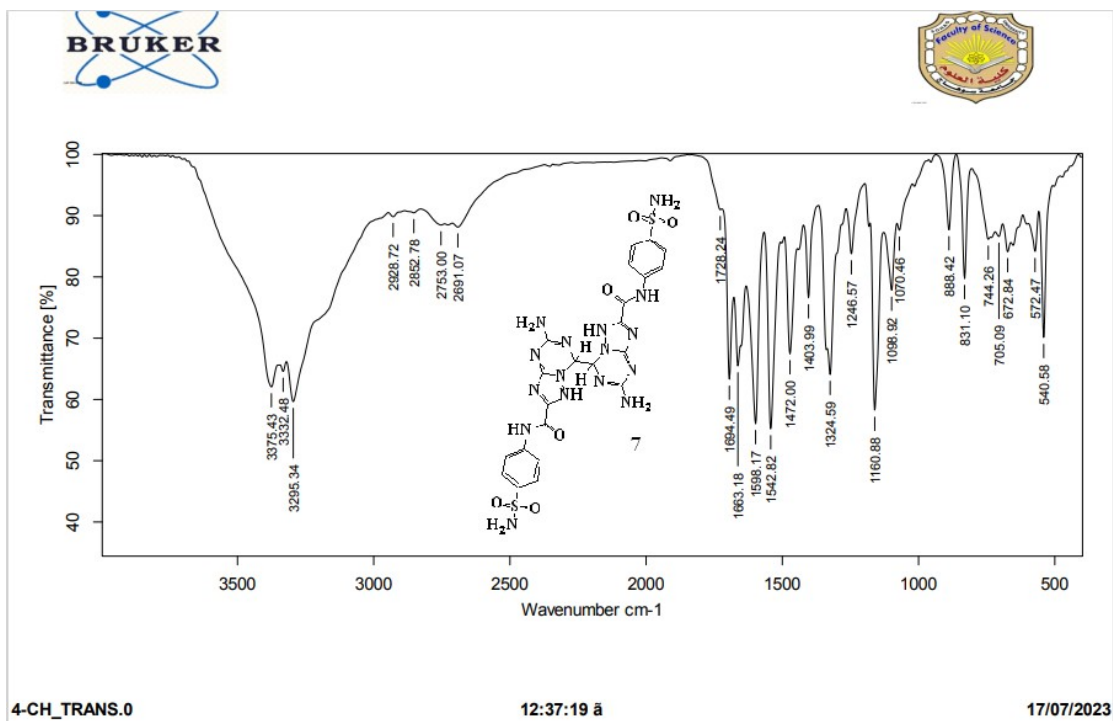

**Figure 13: IR Spectrum of compound 7**

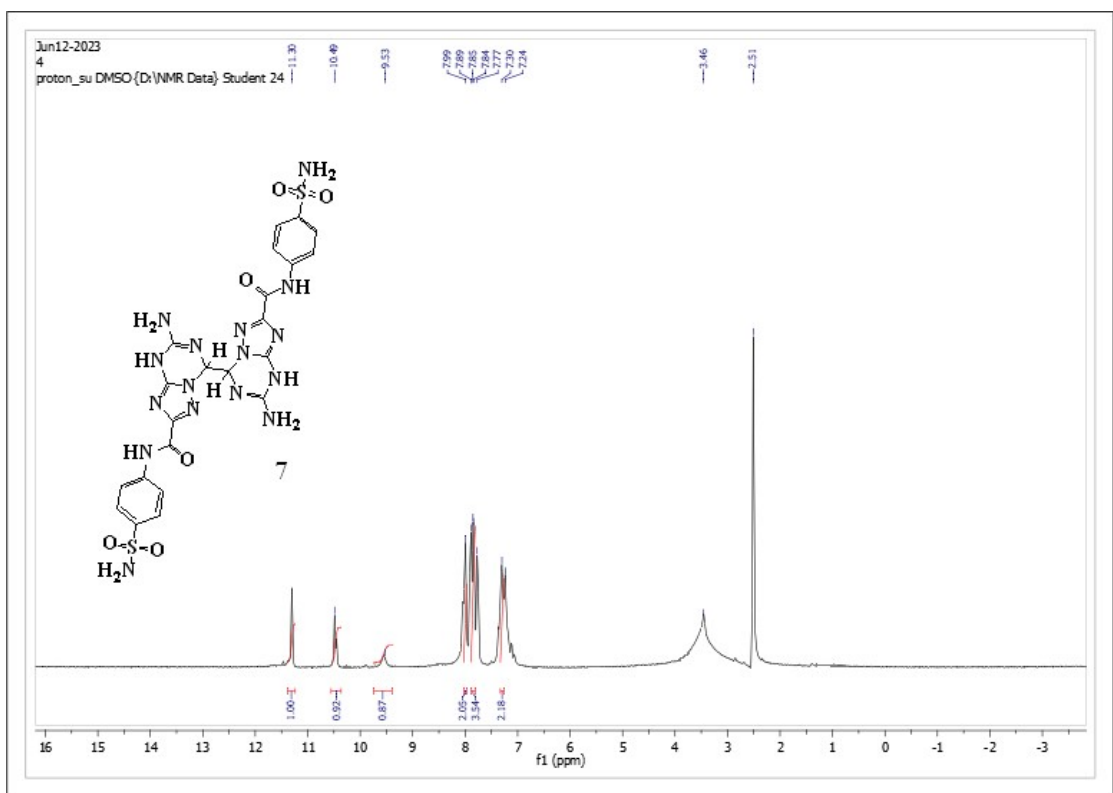

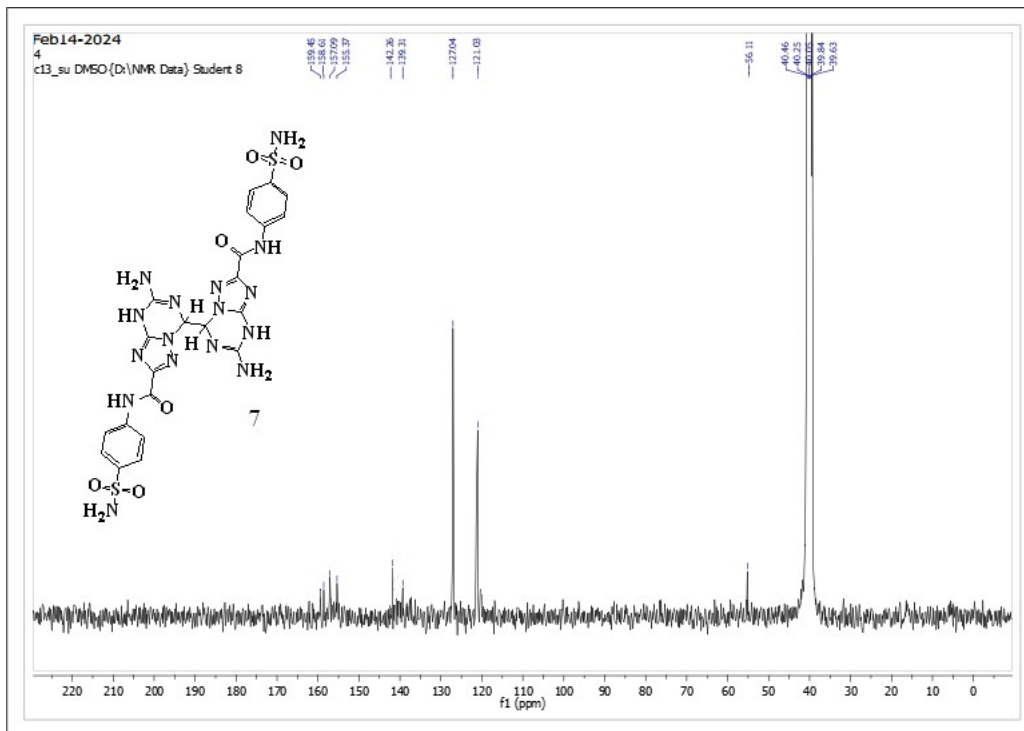

Figure 15:  $^{13}\text{C}$ -NMR Spectrum of compound 7

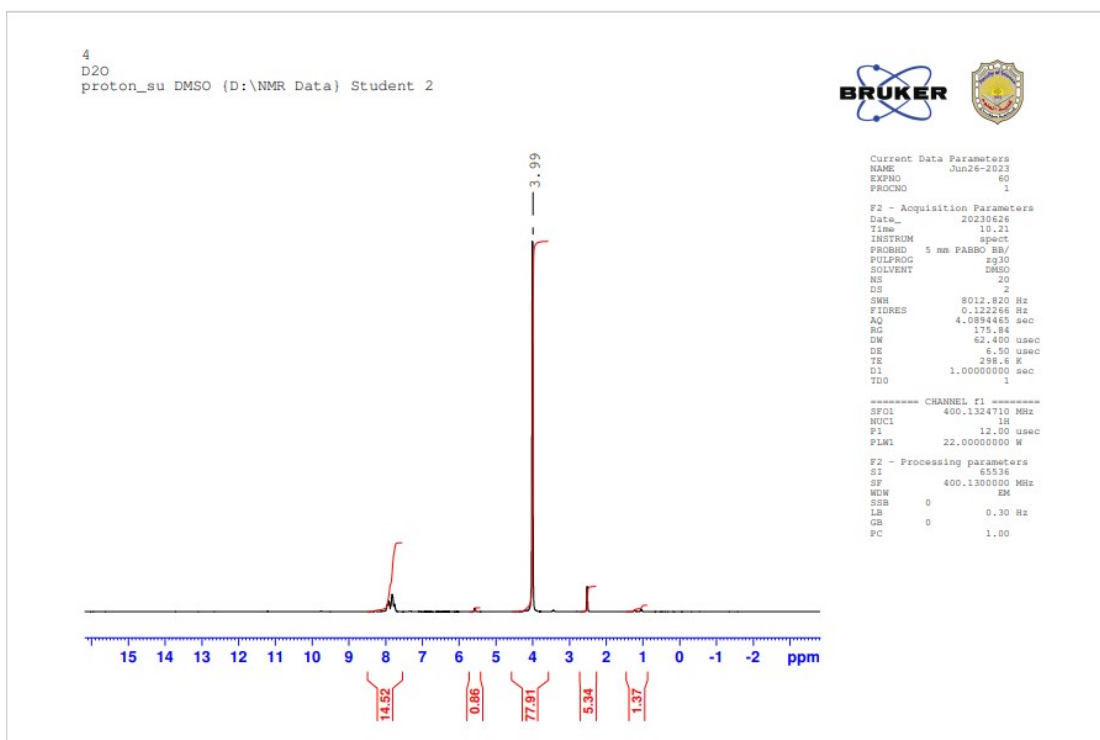

Figure 16:  $\text{D}_2\text{O}$  Spectrum of compound 8



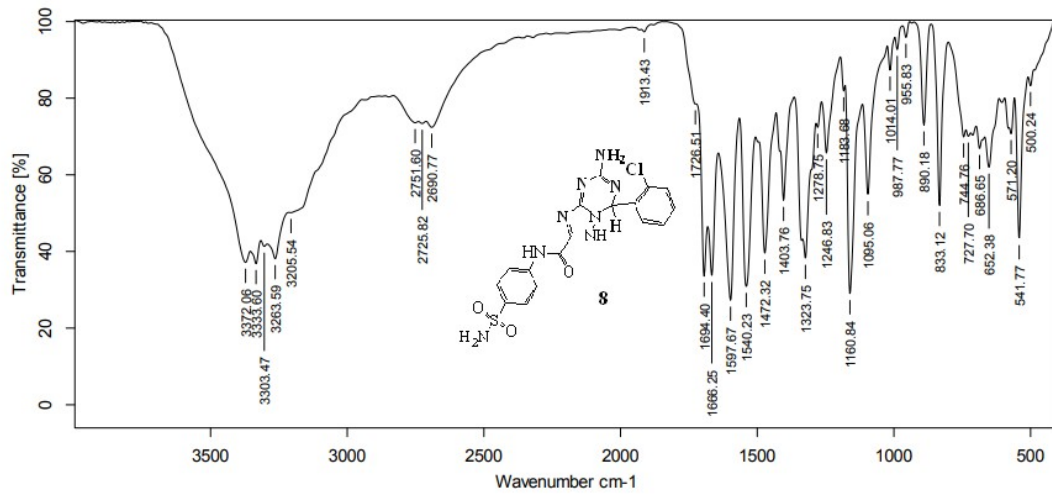

5-CH\_TRANS.0

12:38:37 ā

17/07/2023

**Figure 17: IR Spectrum of compound 8**

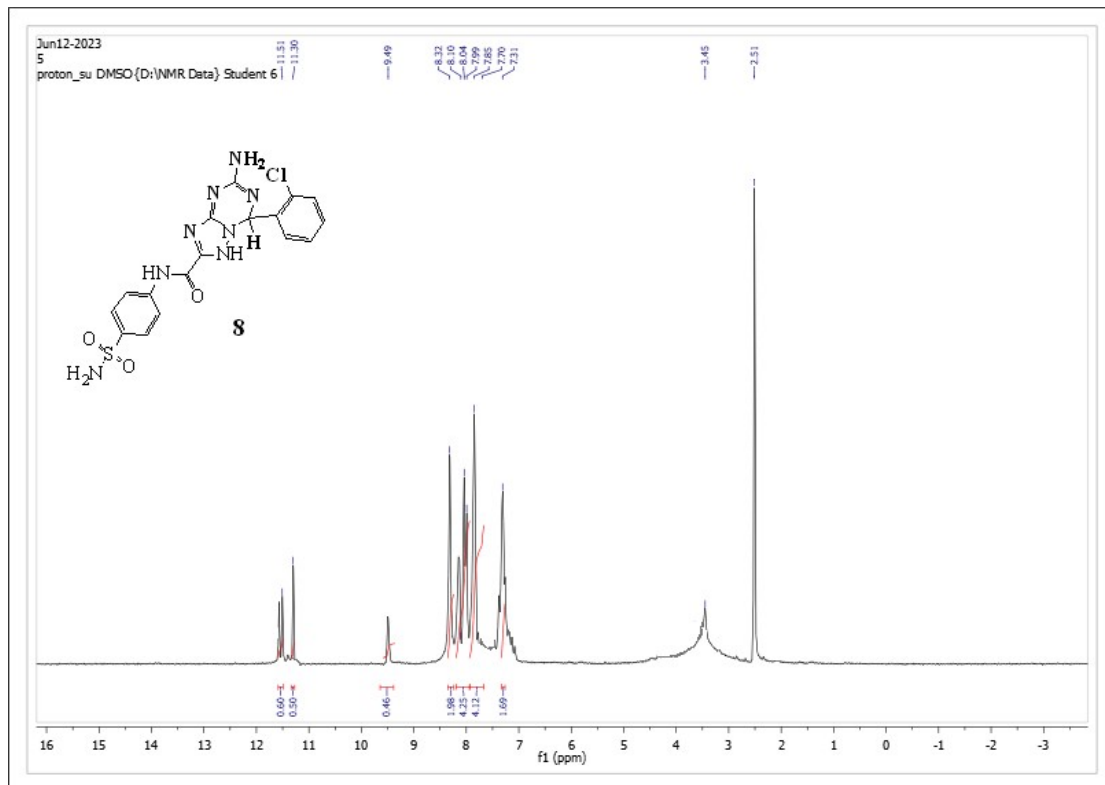

**Figure 18: <sup>1</sup>H NMR Spectrum of compound 8**

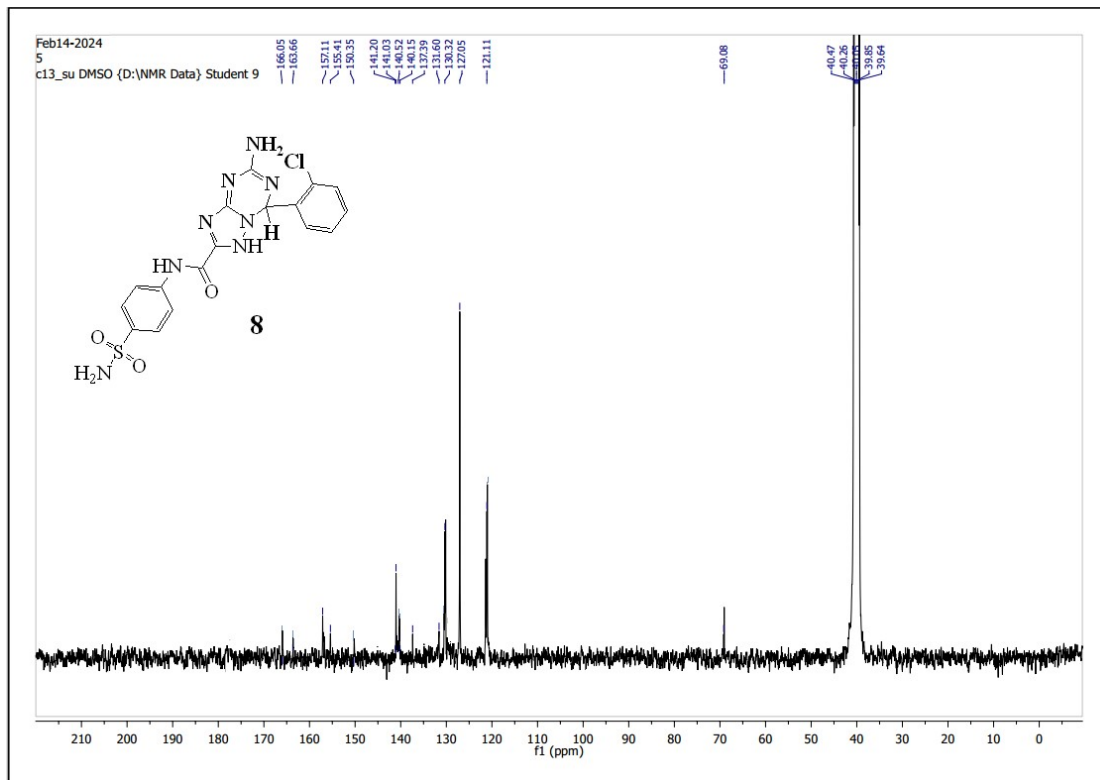

Figure 19:  $^{13}\text{C}$ NMR Spectrum of compound 8

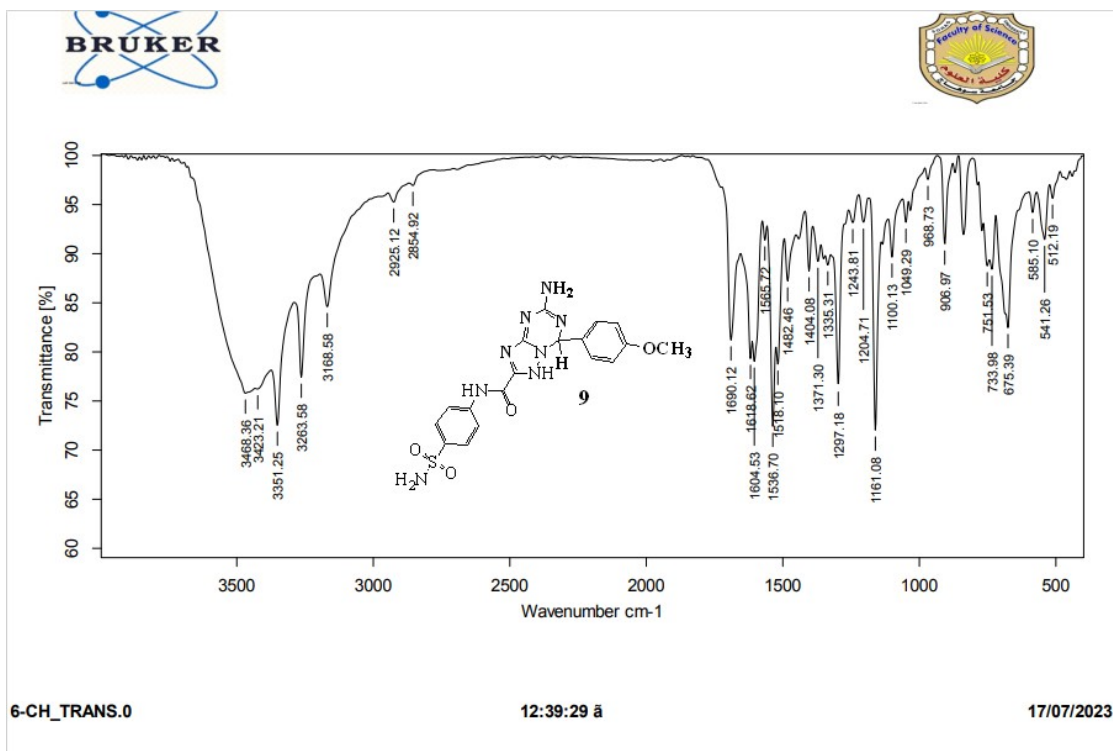

Figure 20: IR Spectrum of compound 9

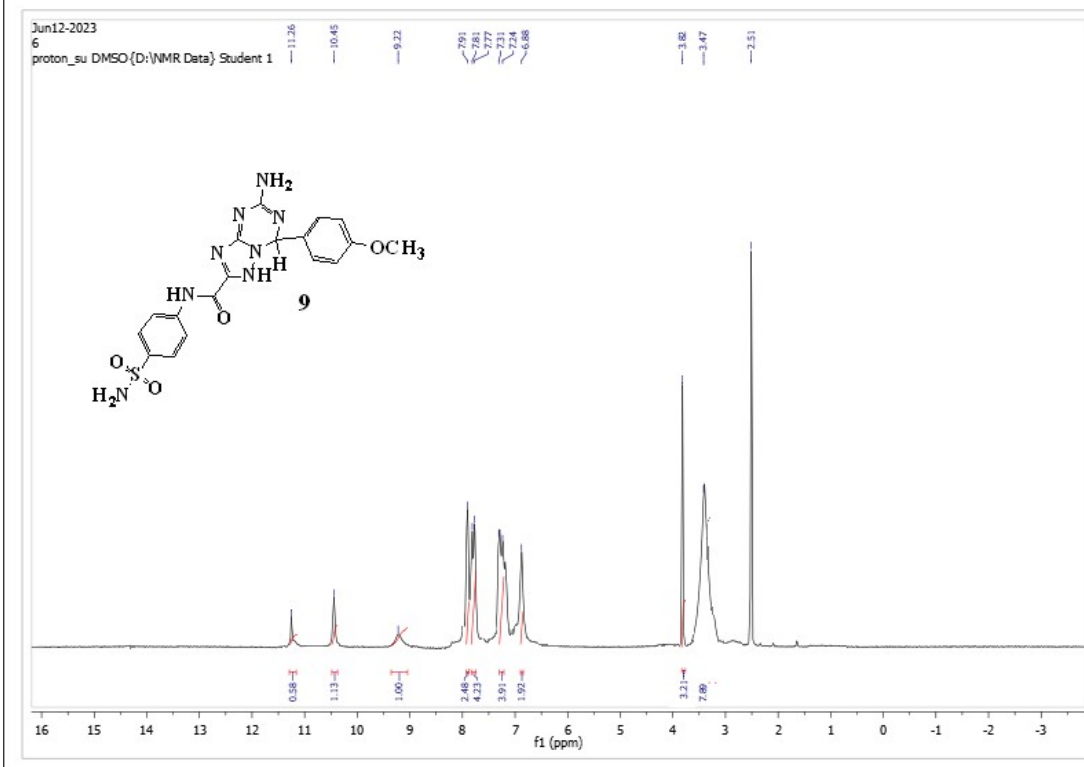

**Figure 21:**  $^1\text{H}$ NMR Spectrum of compound 9

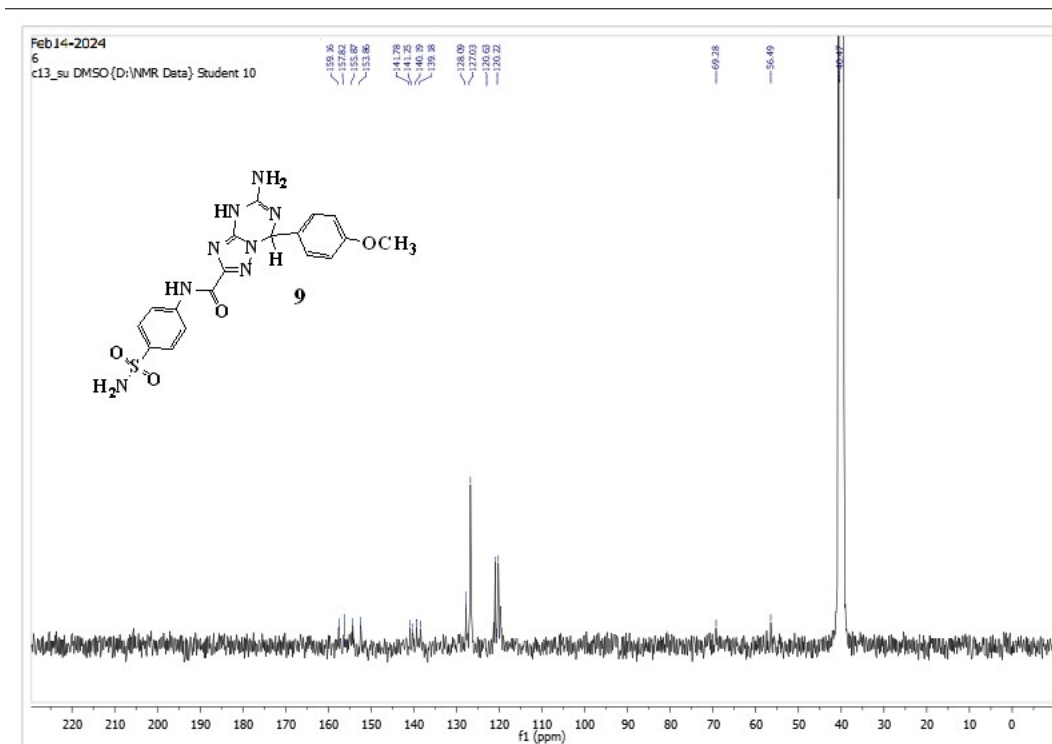

**Figure 22:**  $^{13}\text{C}$ NMR Spectrum of compound 9

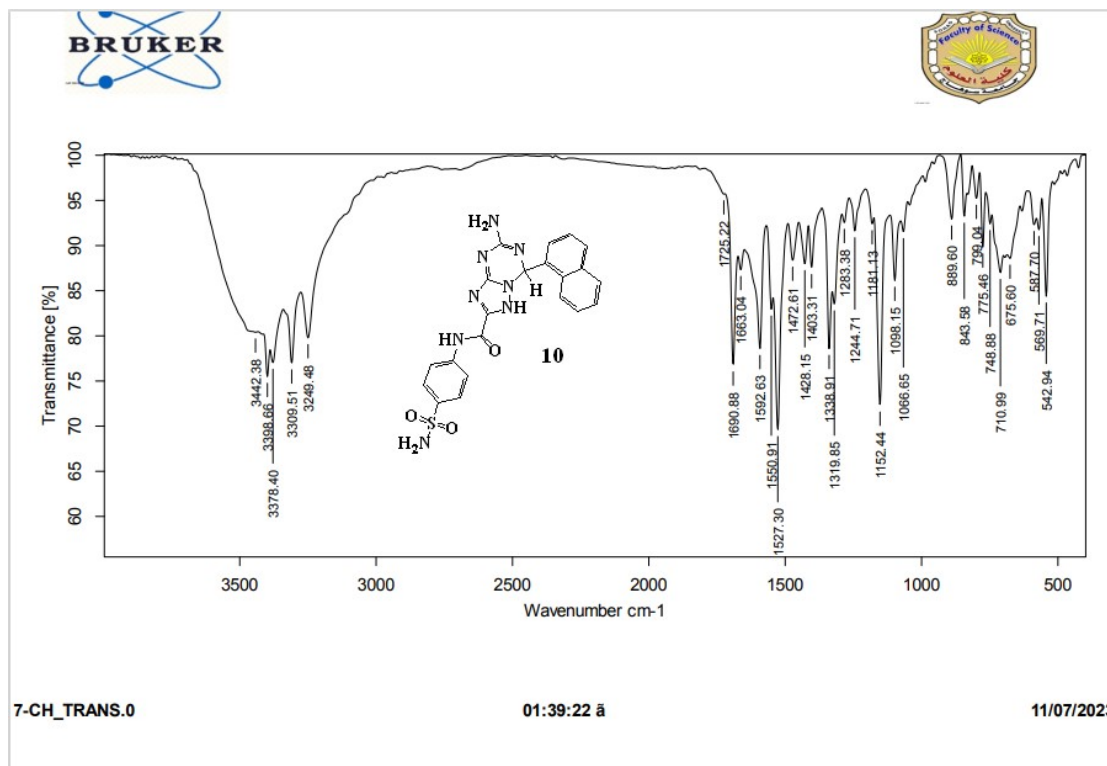

Figure 23: IR Spectrum of compound 10

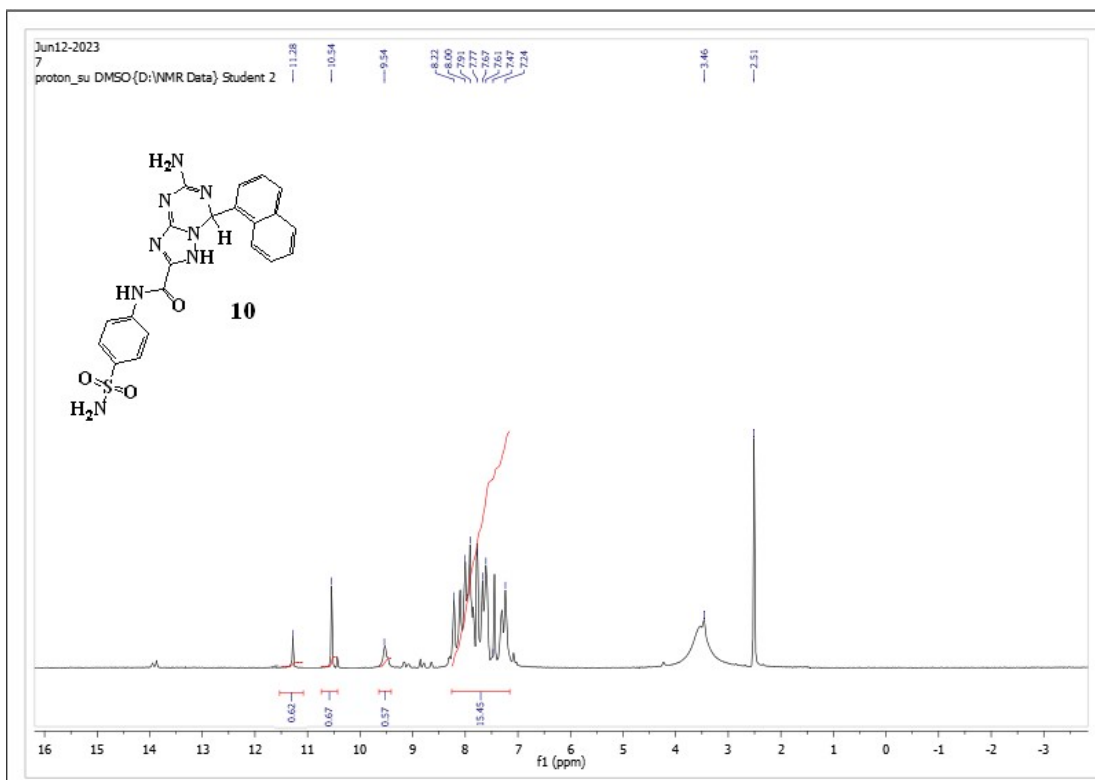

Figure 24: <sup>1</sup>H NMR Spectrum of compound 10

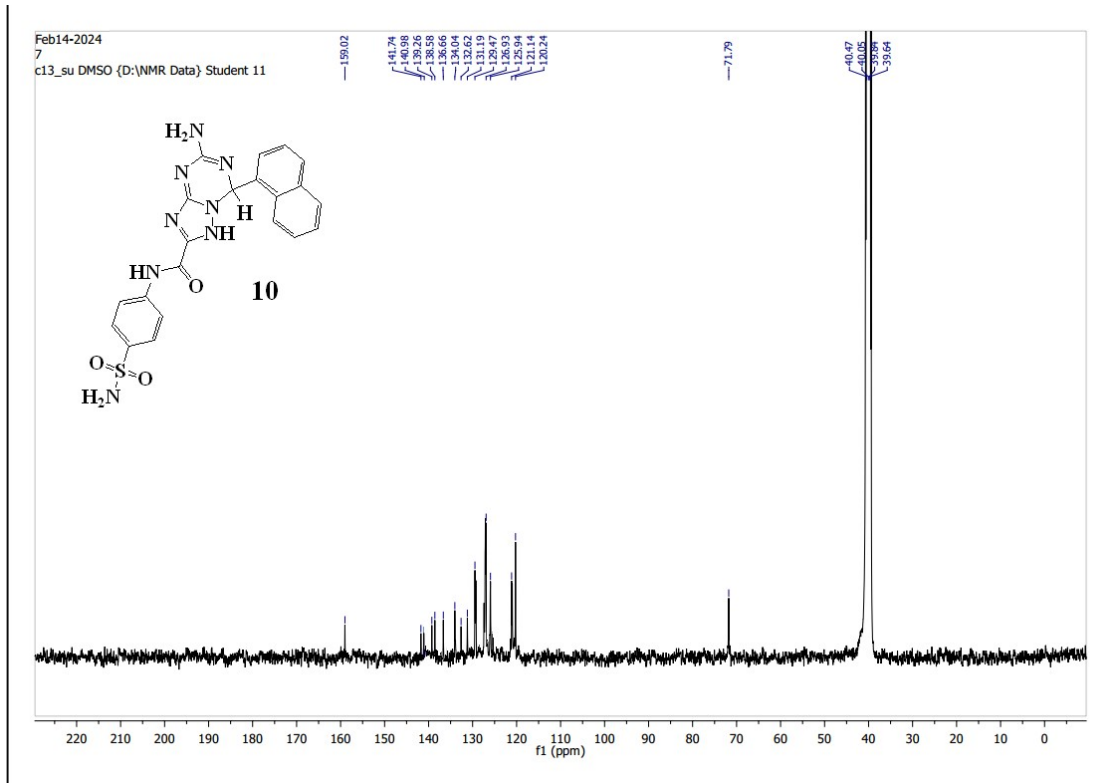

Figure 25:  $^{13}\text{C}$ NMR Spectrum of compound 10

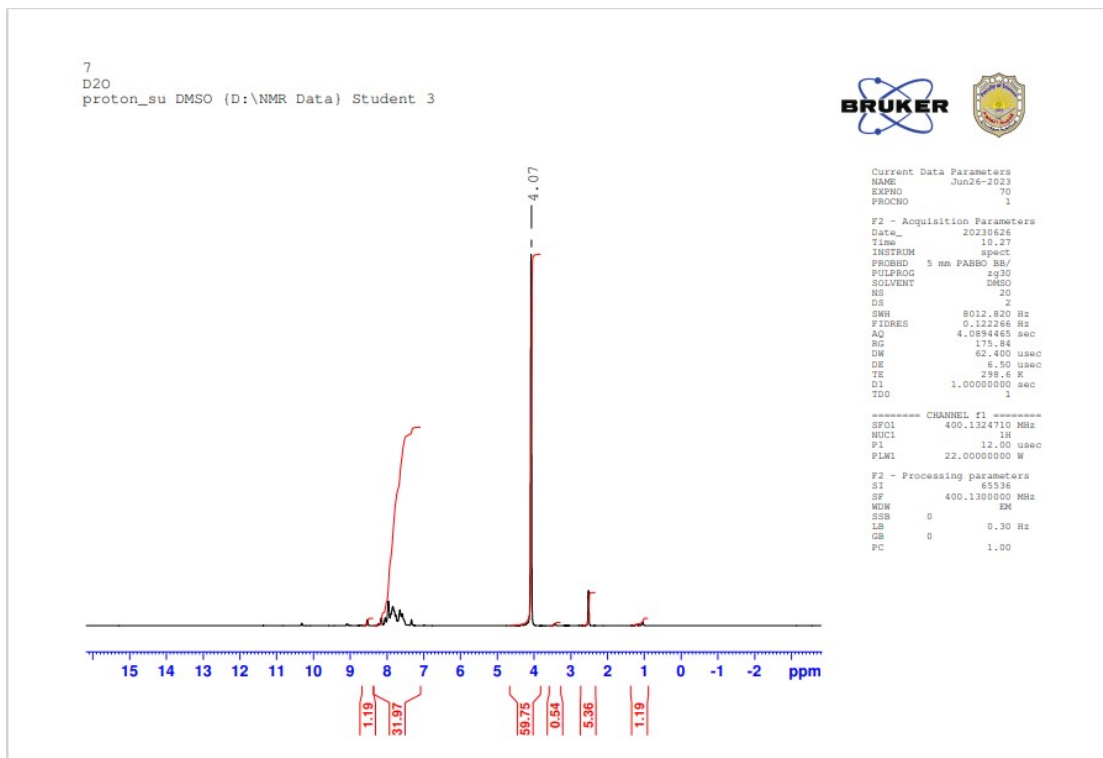

Figure 26:  $\text{D}_2\text{O}$  Spectrum of compound 10

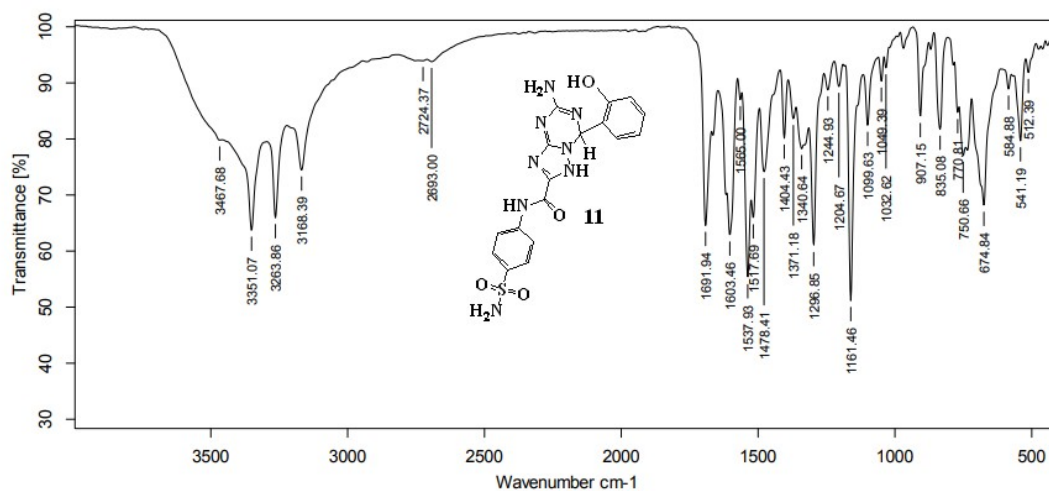

8-CH\_TRANS.0

01:32:27 ā

11/07/2023

Figure 27: IR Spectrum of compound 11

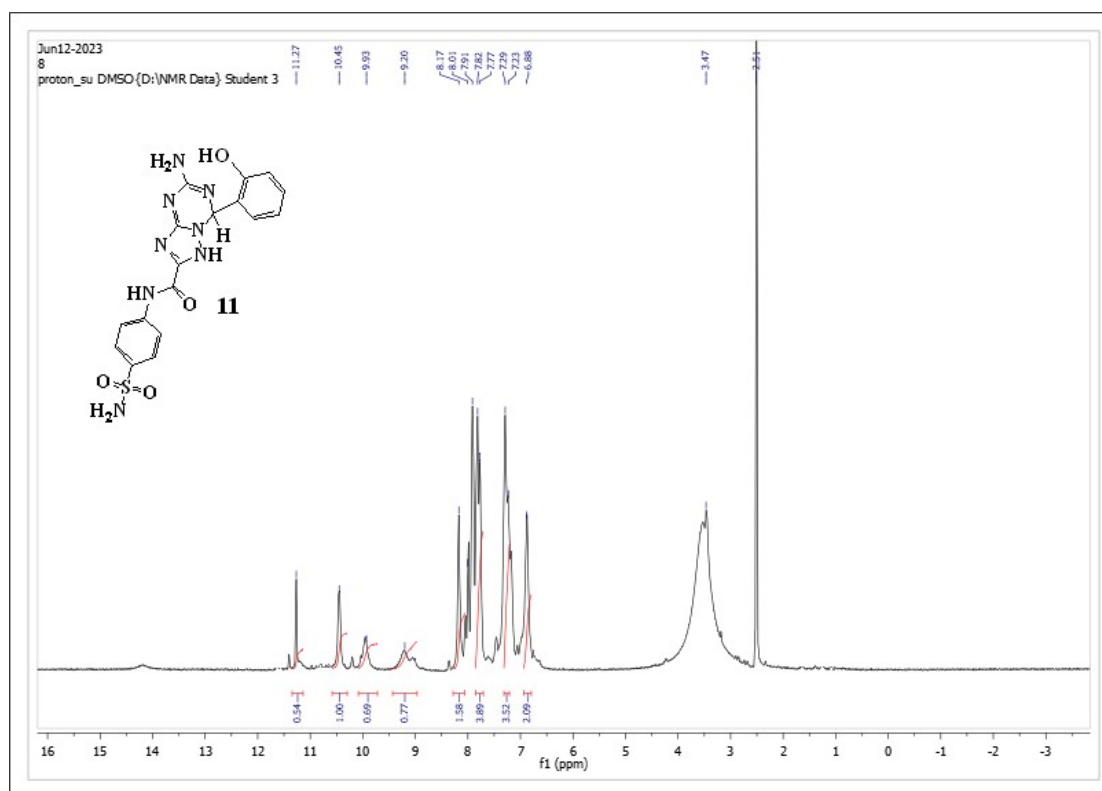Figure 28: <sup>1</sup>H NMR Spectrum of compound 11

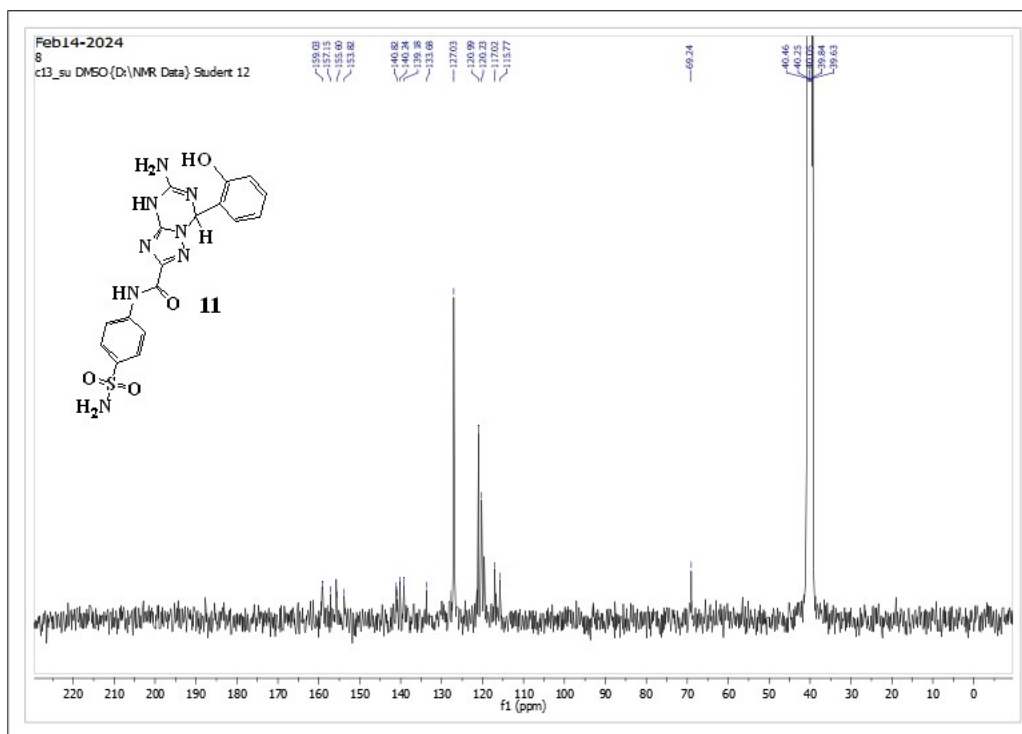

Figure 29:  $^{13}\text{C}$ NMR Spectrum of compound 11

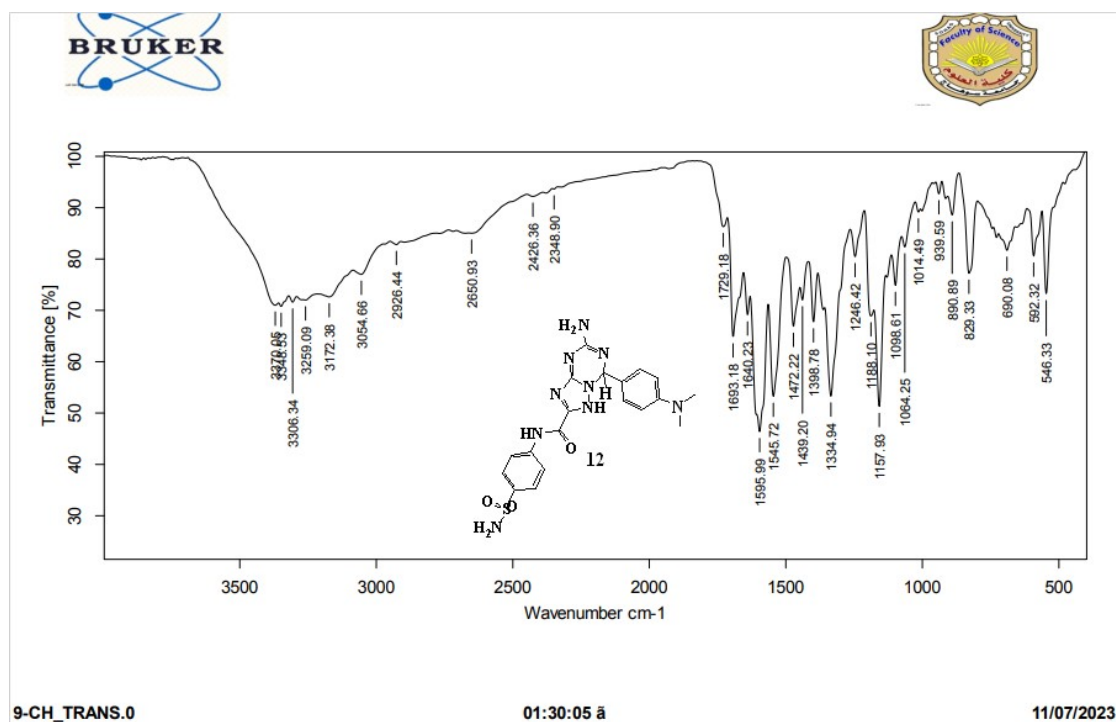

Figure 30: IR Spectrum of compound 12

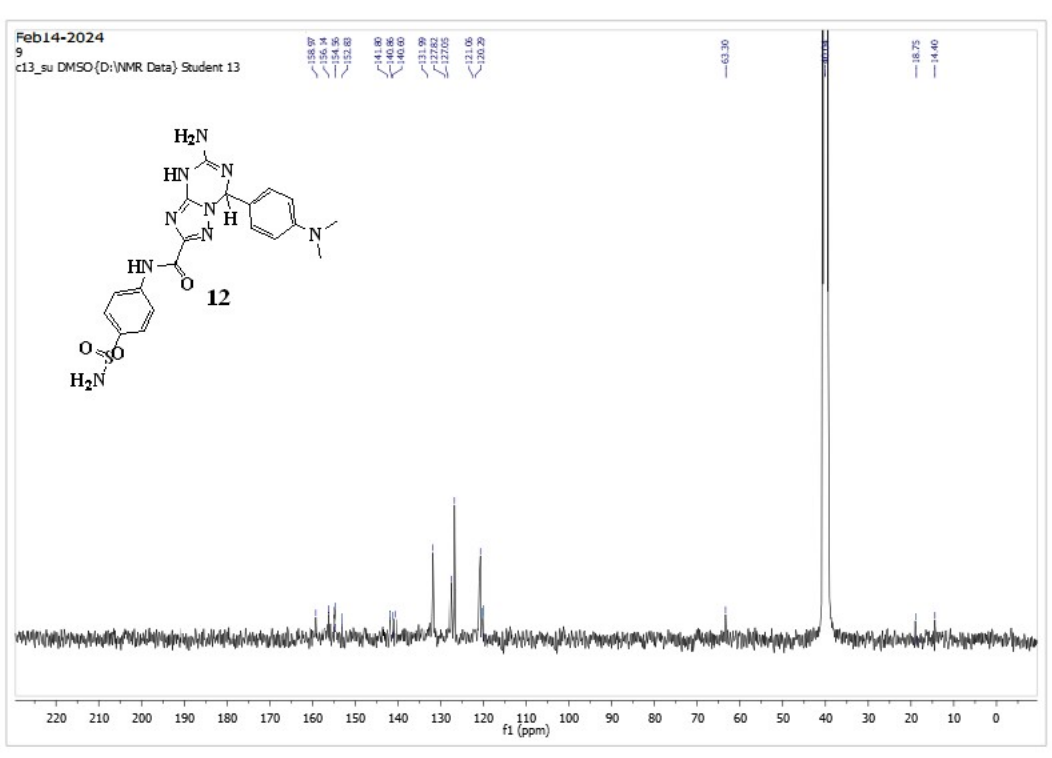

Figure 31:  $^1\text{H}$ NMR Spectrum of compound 12

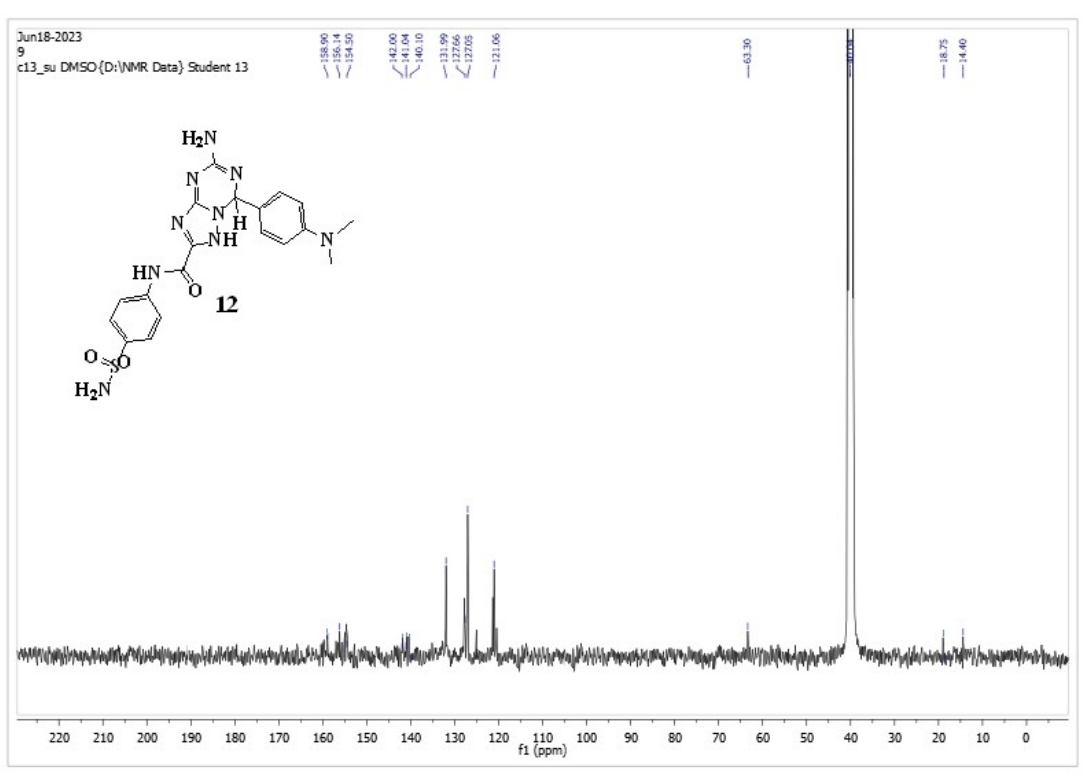

Figure 32:  $^{13}\text{C}$ NMR Spectrum of compound 12



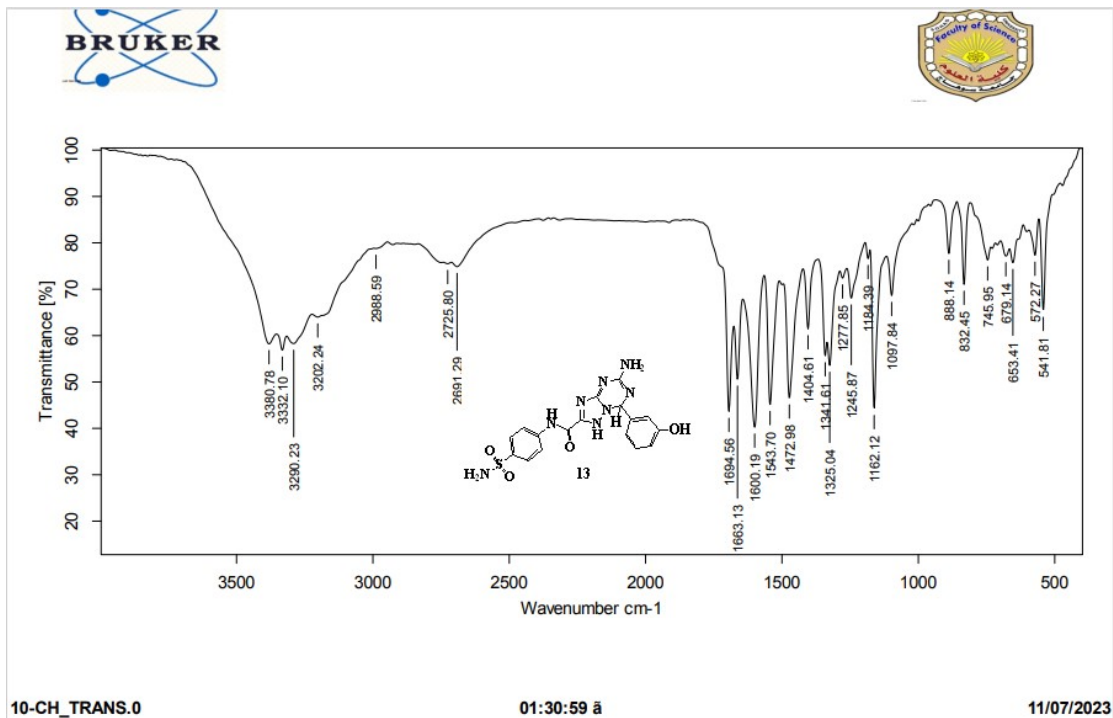

Figure 33: IR Spectrum of compound 13

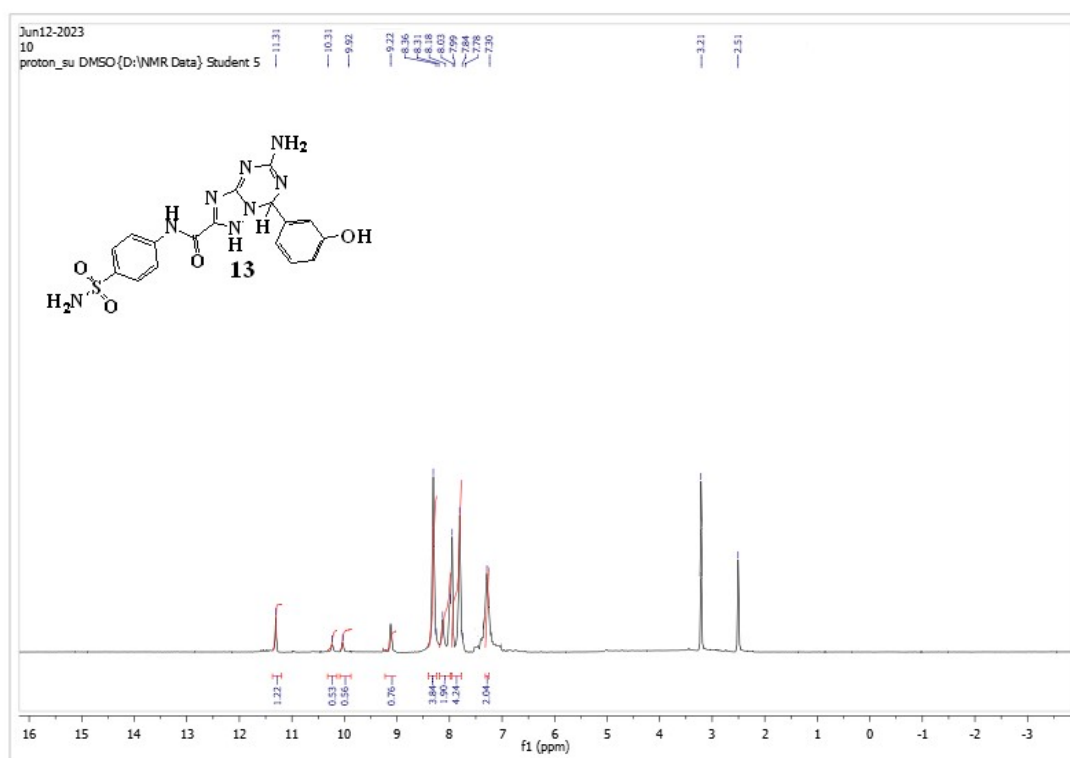

Figure 34: <sup>1</sup>H NMR Spectrum of compound 13

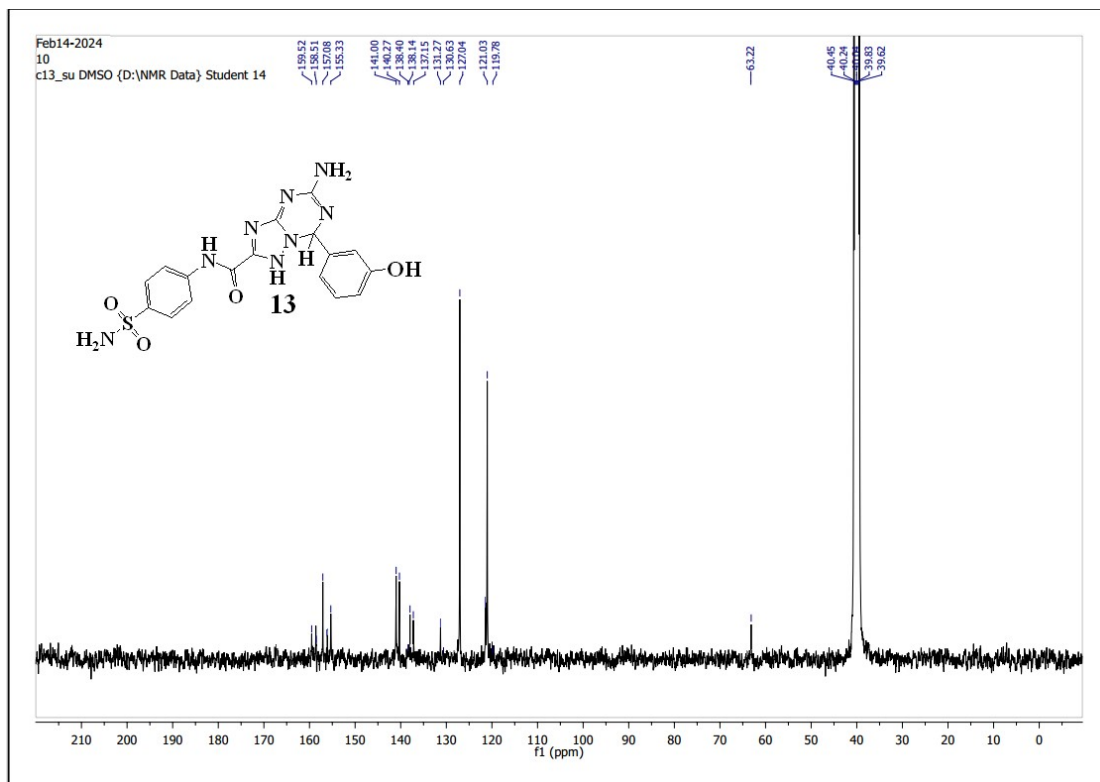

Figure 35:  $^{13}\text{C}$ NMR Spectrum of compound 13
